# Supplementary material for: Reconstructing 6-hourly PM 2.5 datasets from 1960 to 2020 in China
Source: Copernicus journal article supplement (doi:10.5194/essd-14-3197-2022), 2022-07-12
Supplement: Supplementary file 1 [file essd-14-3197-2022-supplement.pdf]

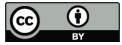

*Supplement of*

## **Reconstructing 6-hourly PM<sub>2.5</sub> datasets from 1960 to 2020 in China**

**Junting Zhong et al.**

*Correspondence to:* Xiaoye Zhang (xiaoye@cma.gov.cn)

The copyright of individual parts of the supplement might differ from the article licence.

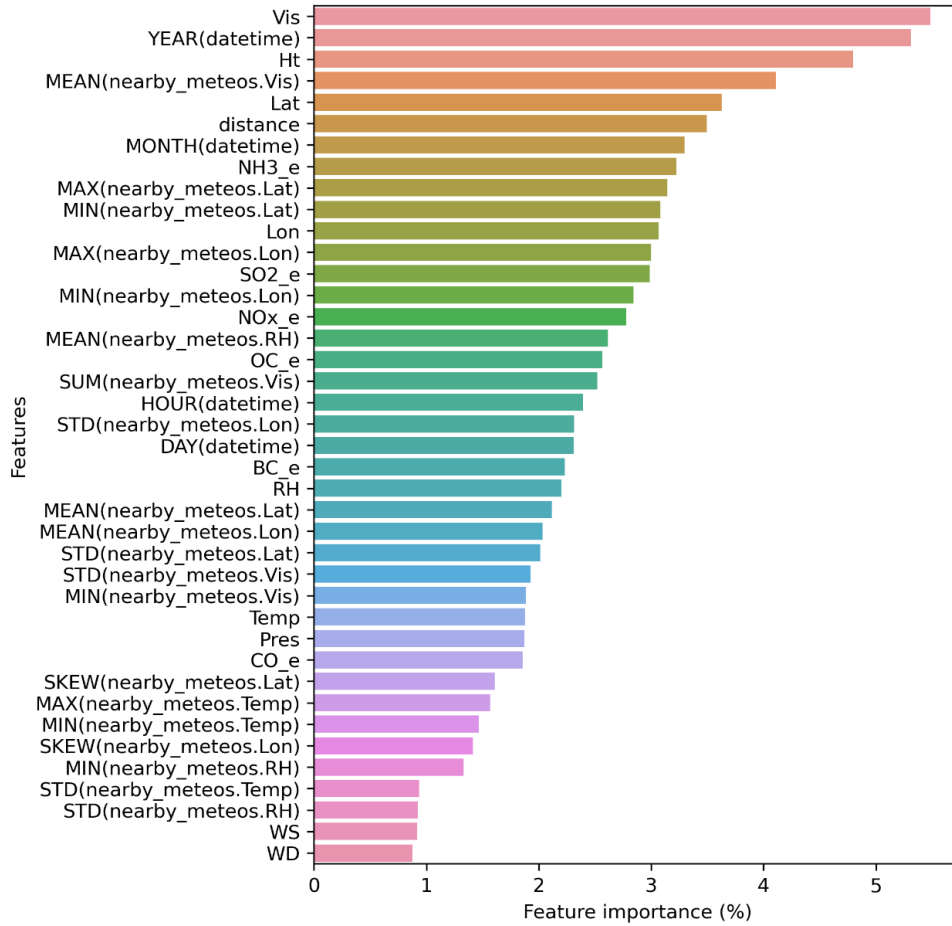

**Fig. S1** Relative importance of all the features used in our model
